# Supplementary material for: Hypoxia Drives Dihydropyrimidine Dehydrogenase Expression in Macrophages and Confers Chemoresistance in Colorectal Cancer
Source: PubMed Central journal article supplement — Cancer Res. 2021 Oct 13;81(23):5963–76. doi: 10.1158/0008-5472.CAN-21-1572 (PMC9397622; doi:10.1158/0008-5472.can-21-1572), 2021-10-13

# Supplementary Figure S1

**A**

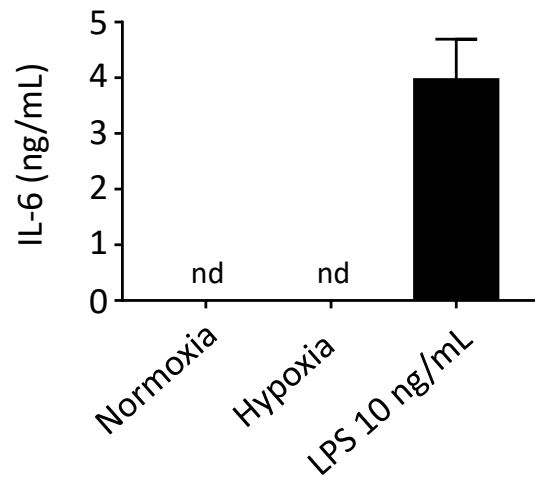

**B**

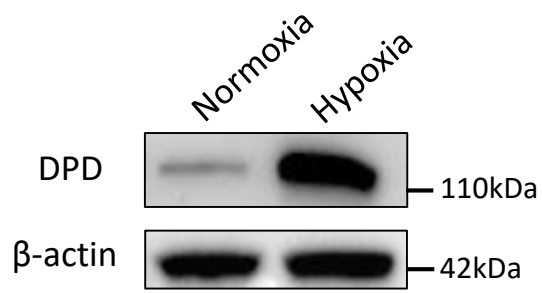

# Supplementary Figure S2

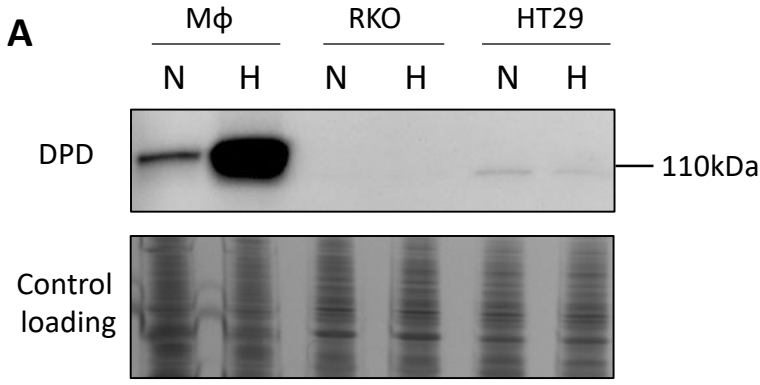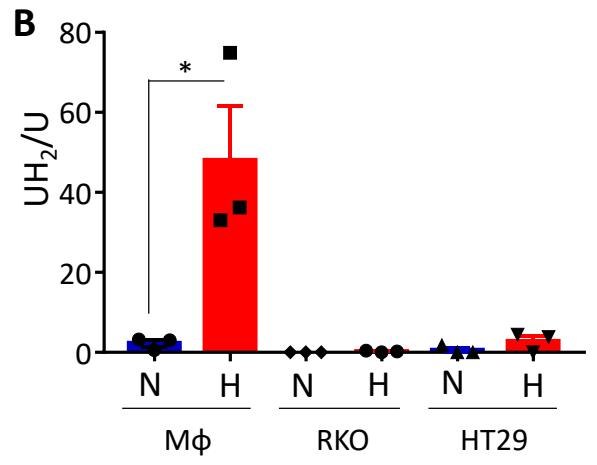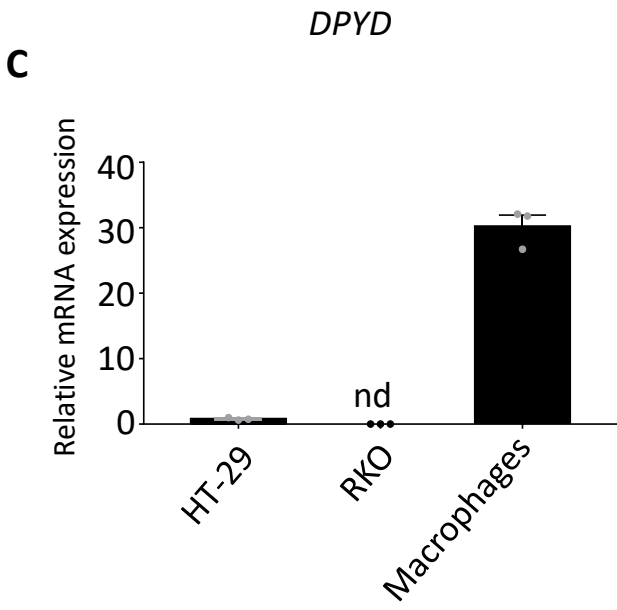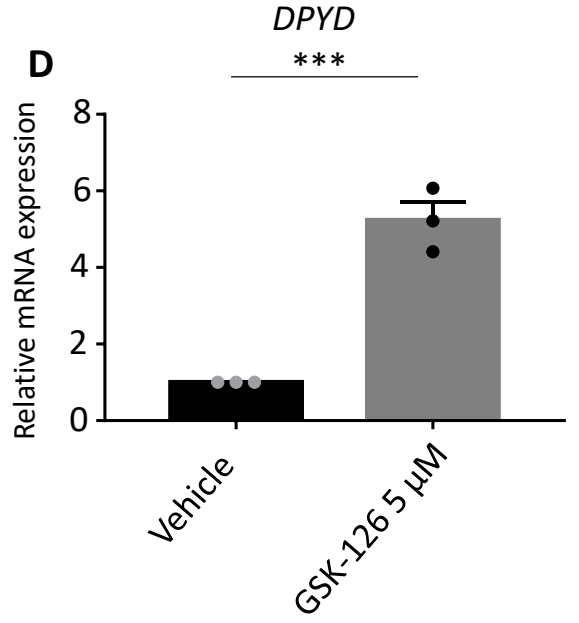

# Supplementary Figure S3

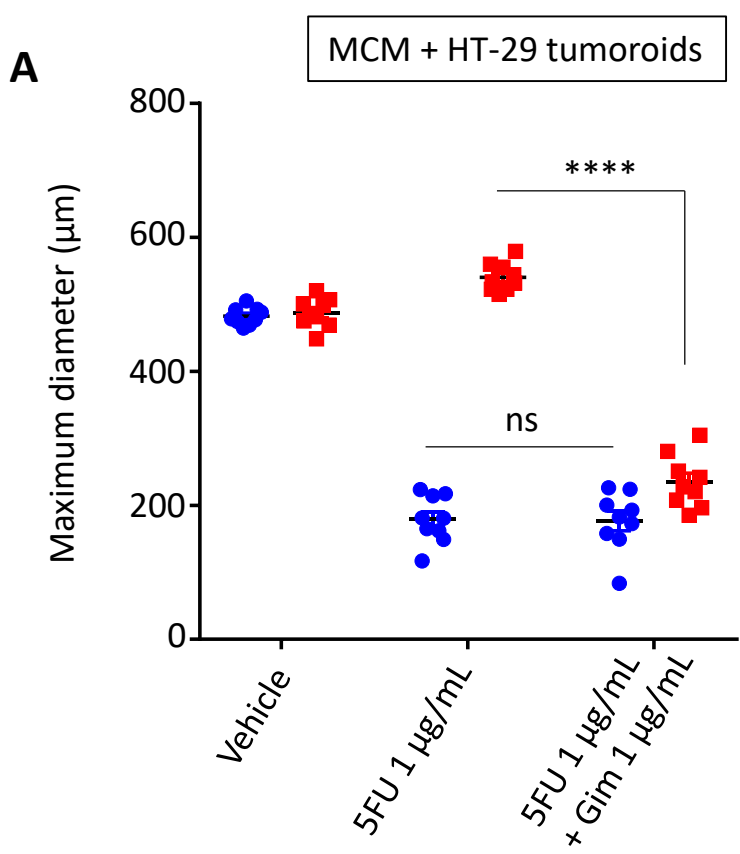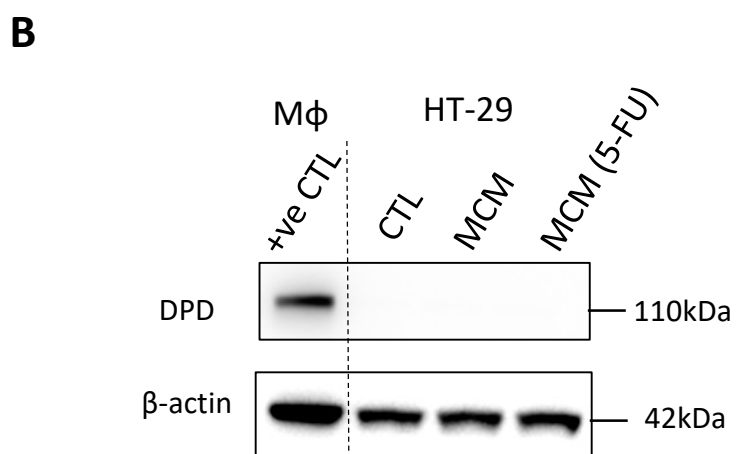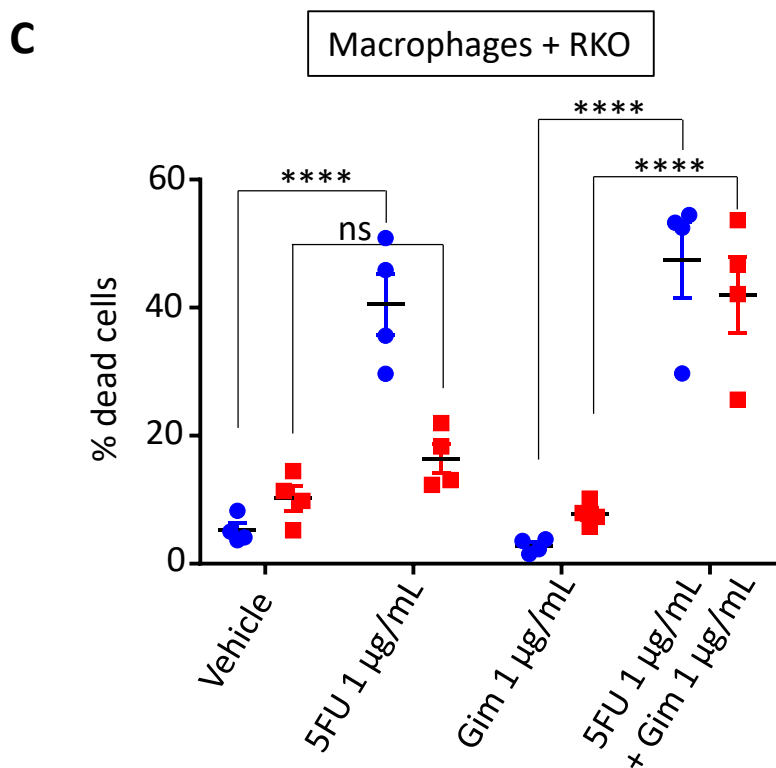

# Supplementary Figure S4

**A**

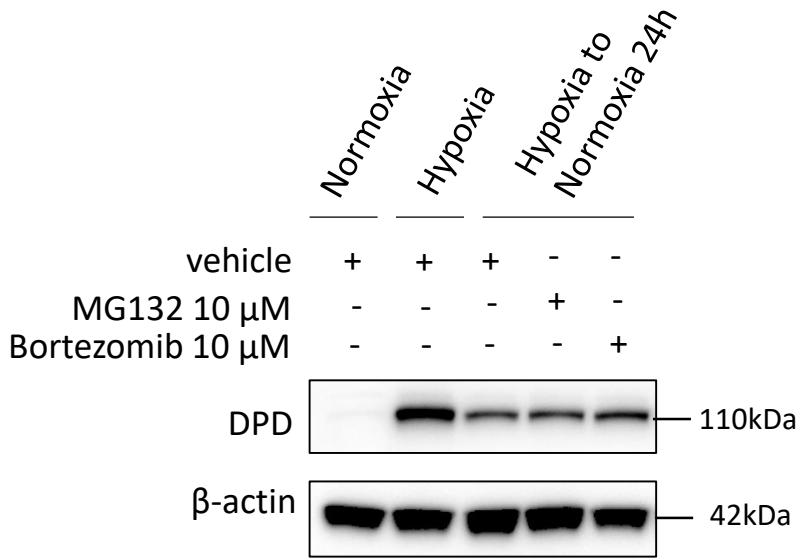

**B**

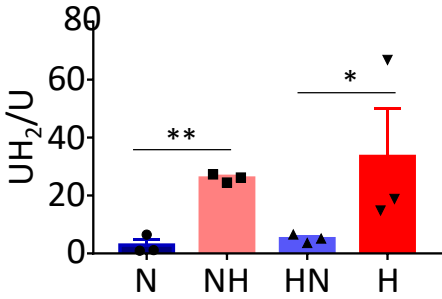

**C**

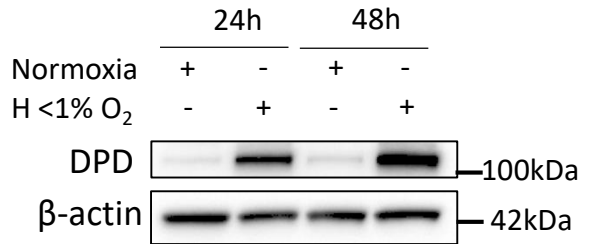

**D**

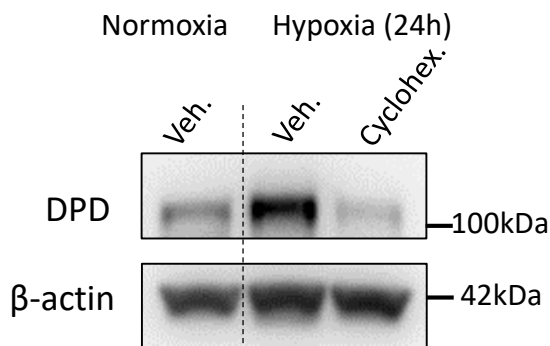

# Supplementary Figure S5

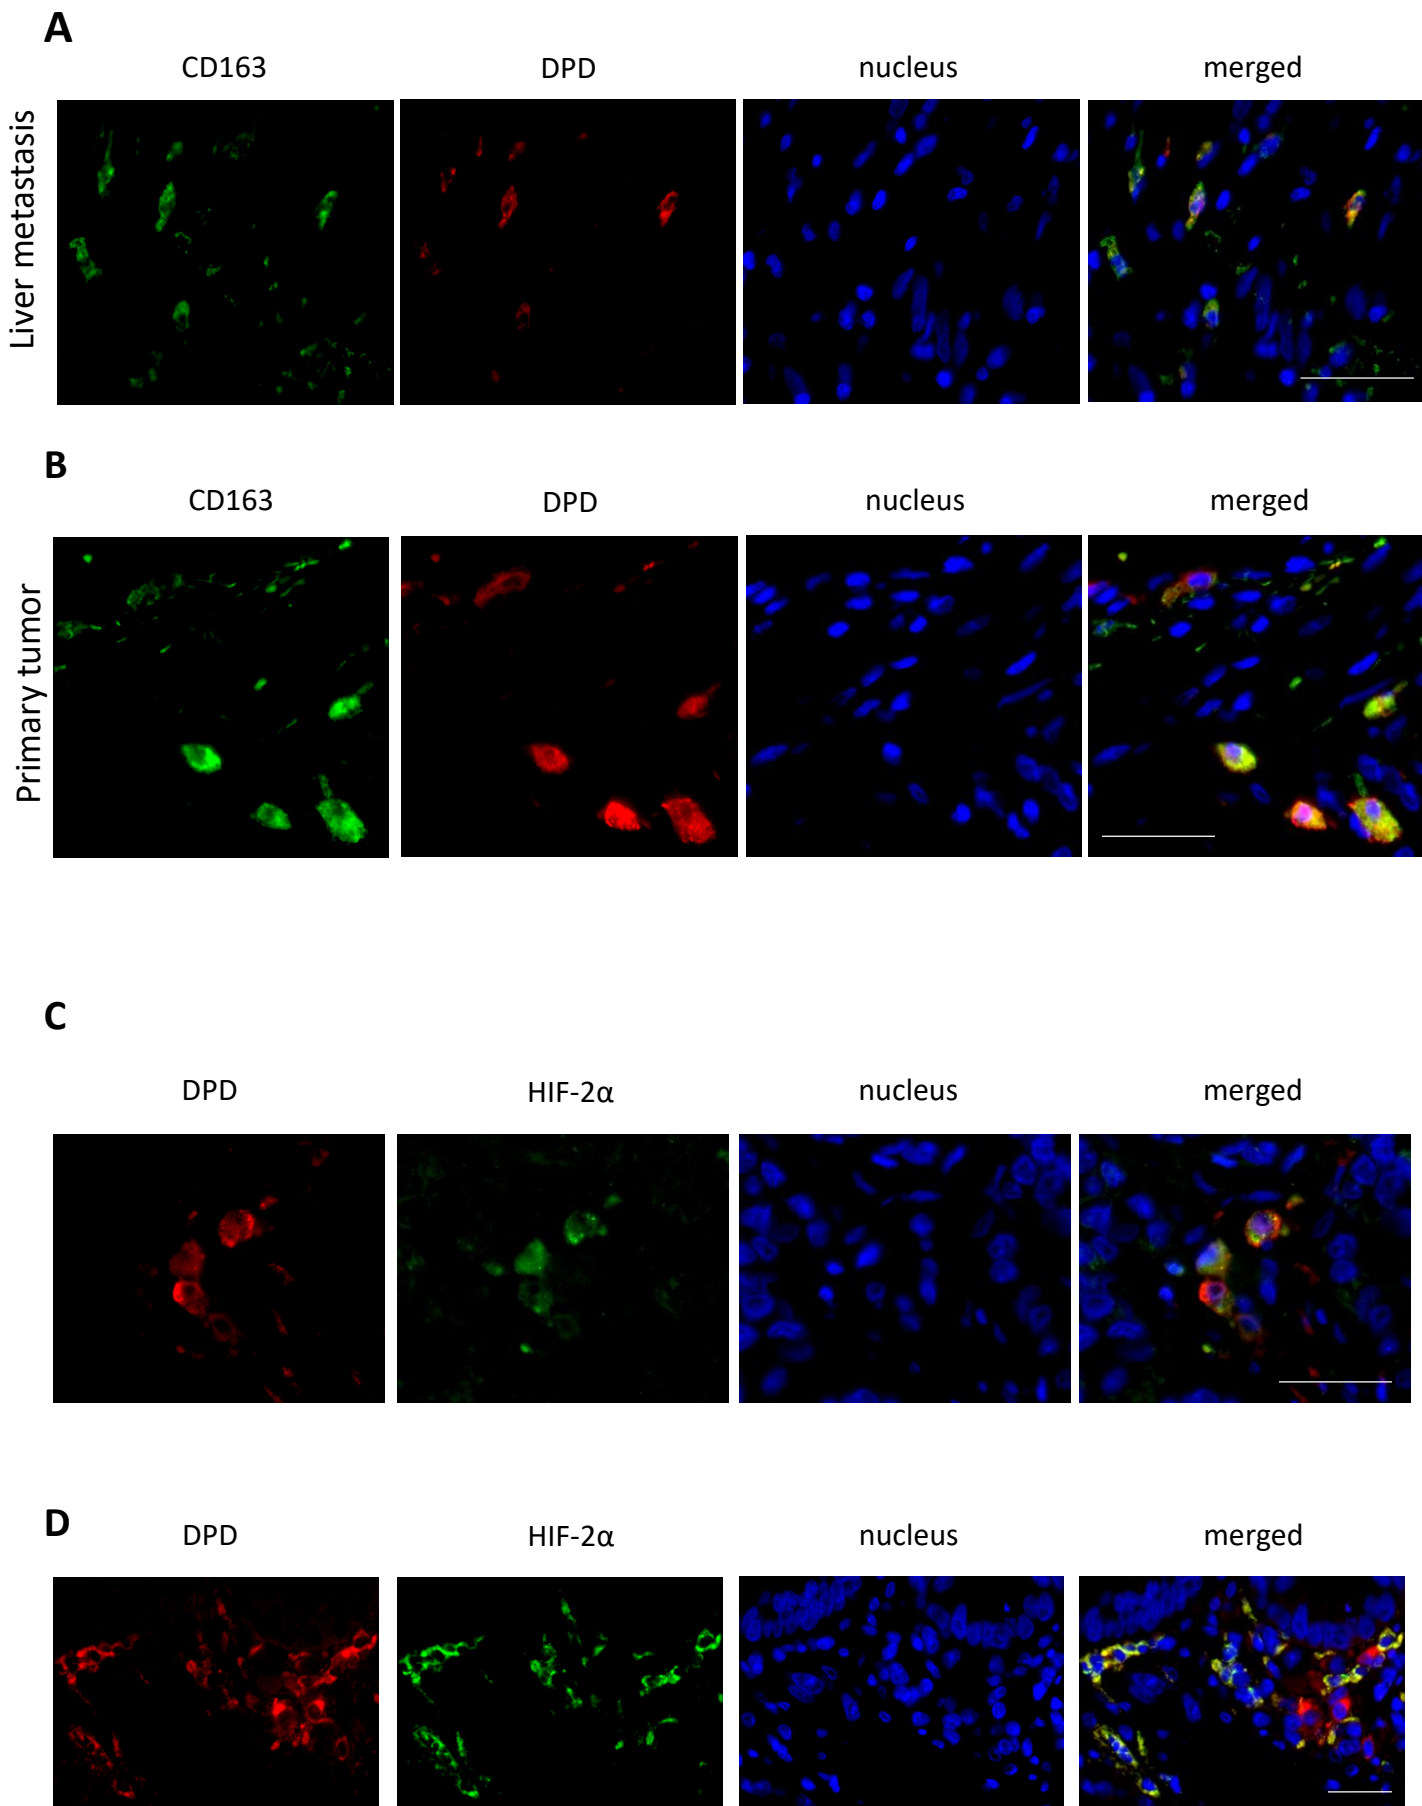

# Supplementary Figure S6

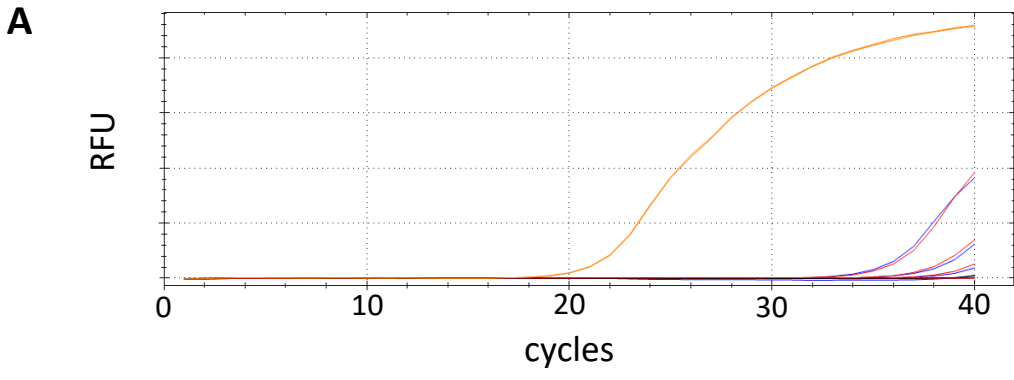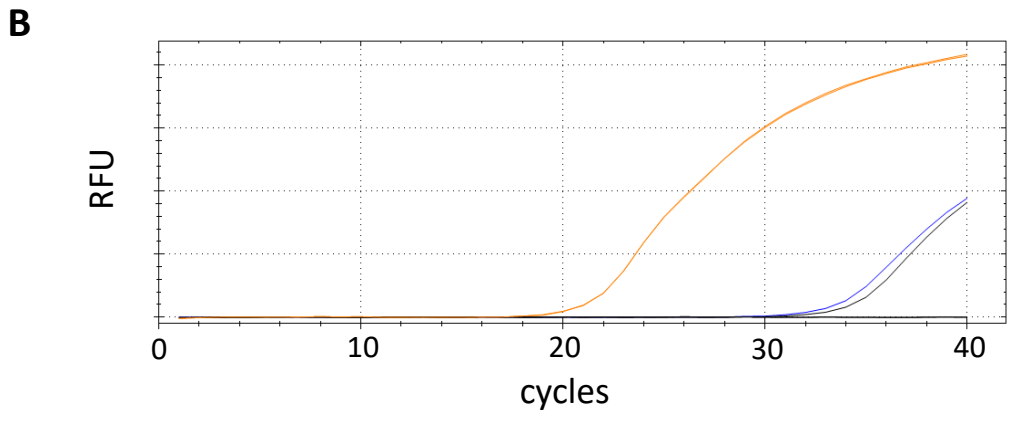

# Supplementary Figure S7

**A**

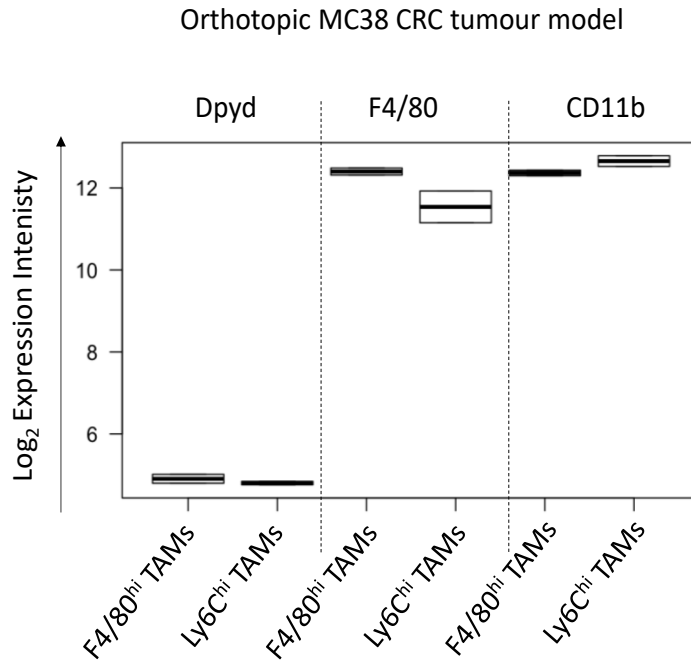

**B**

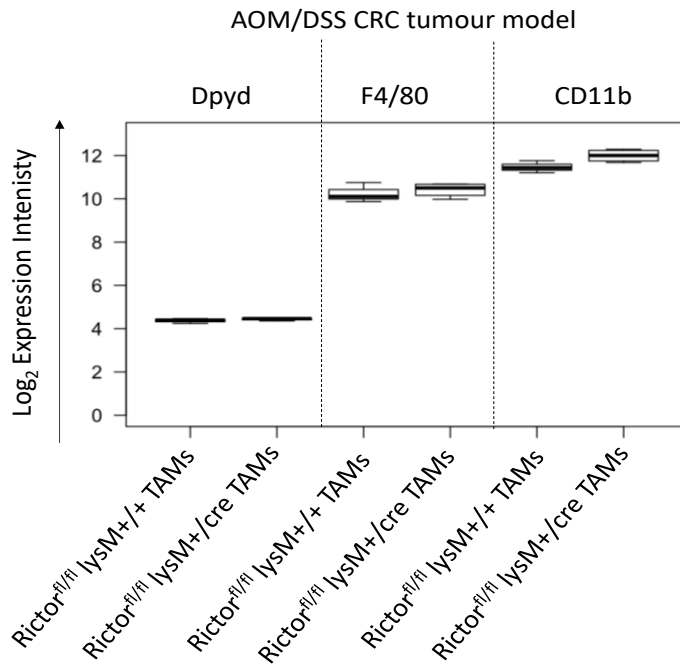

**C**

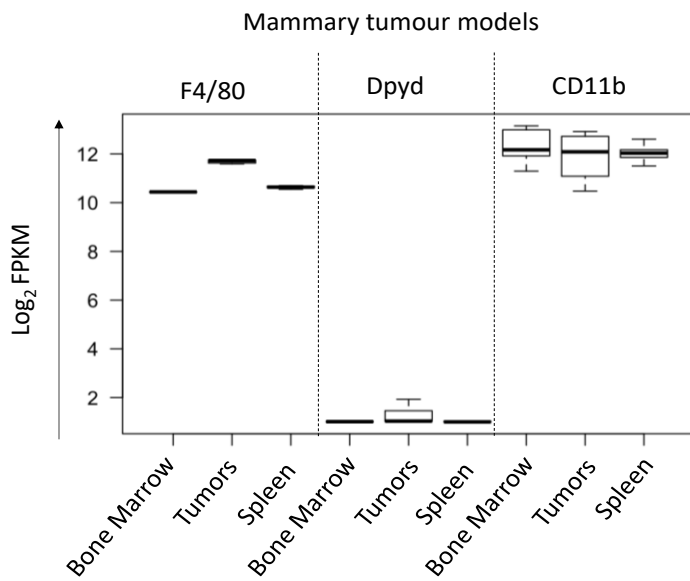

Supplement: can-21-1572_supplementary_figures_suppsf1-sf7.pdf [file can-21-1572_supplementary_figures_suppsf1-sf7.pdf]
